# Supplementary material for: Integrin α5β1 regulates PP2A complex assembly through PDE4D in atherosclerosis
Source: JCI journal article supplement (doi:10.1172/jci127692), 2019-08-13
Supplement: sd1 [file 1]

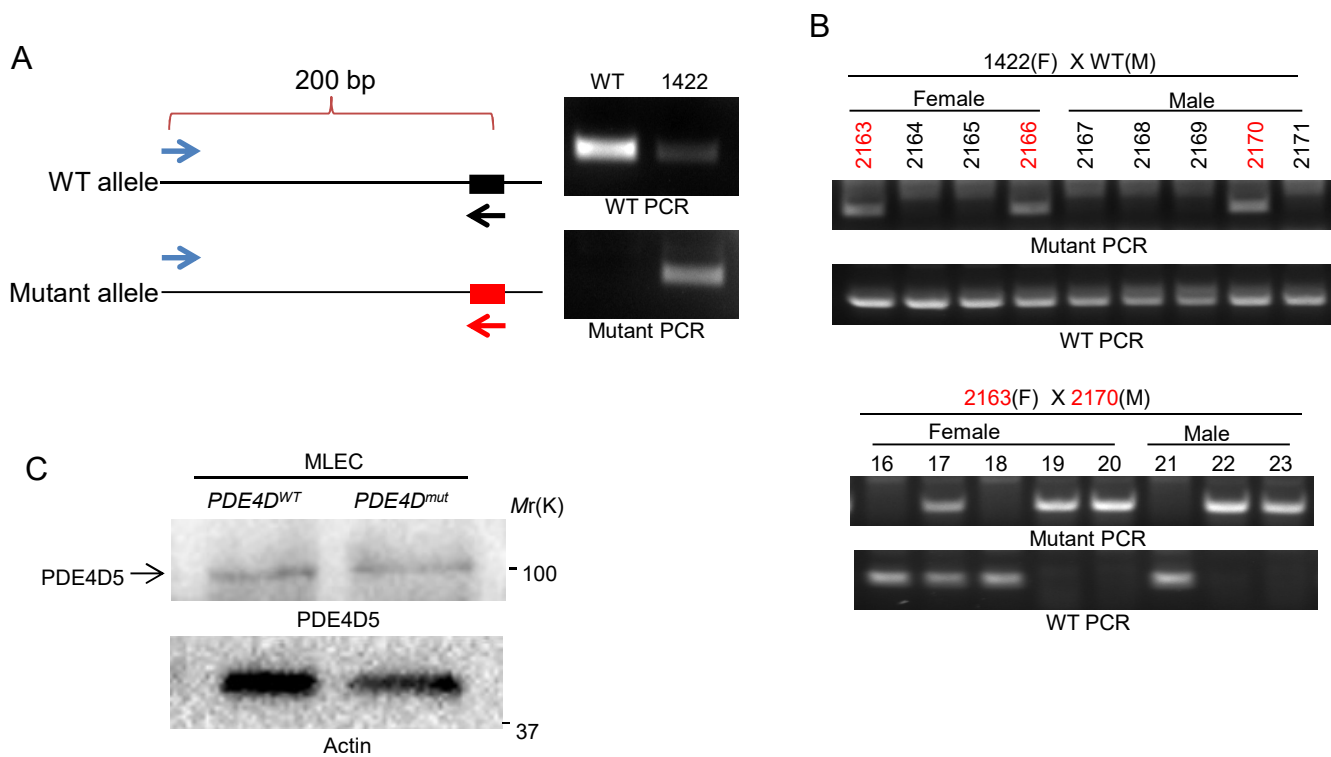

1. Generation of *PDE4D<sup>mut</sup>* mice

**A.** Genotype was screened by PCR using primers that discriminate between wild type and mutant alleles. **B.** Germ-line transmission. The mutant allele was successfully inherited in F1 and F2 offspring, including homozygous F2 pups. **C.** PDE4D5 protein levels. Endothelial cells from each strain were lysed and immunoblotted for PDE4D5.

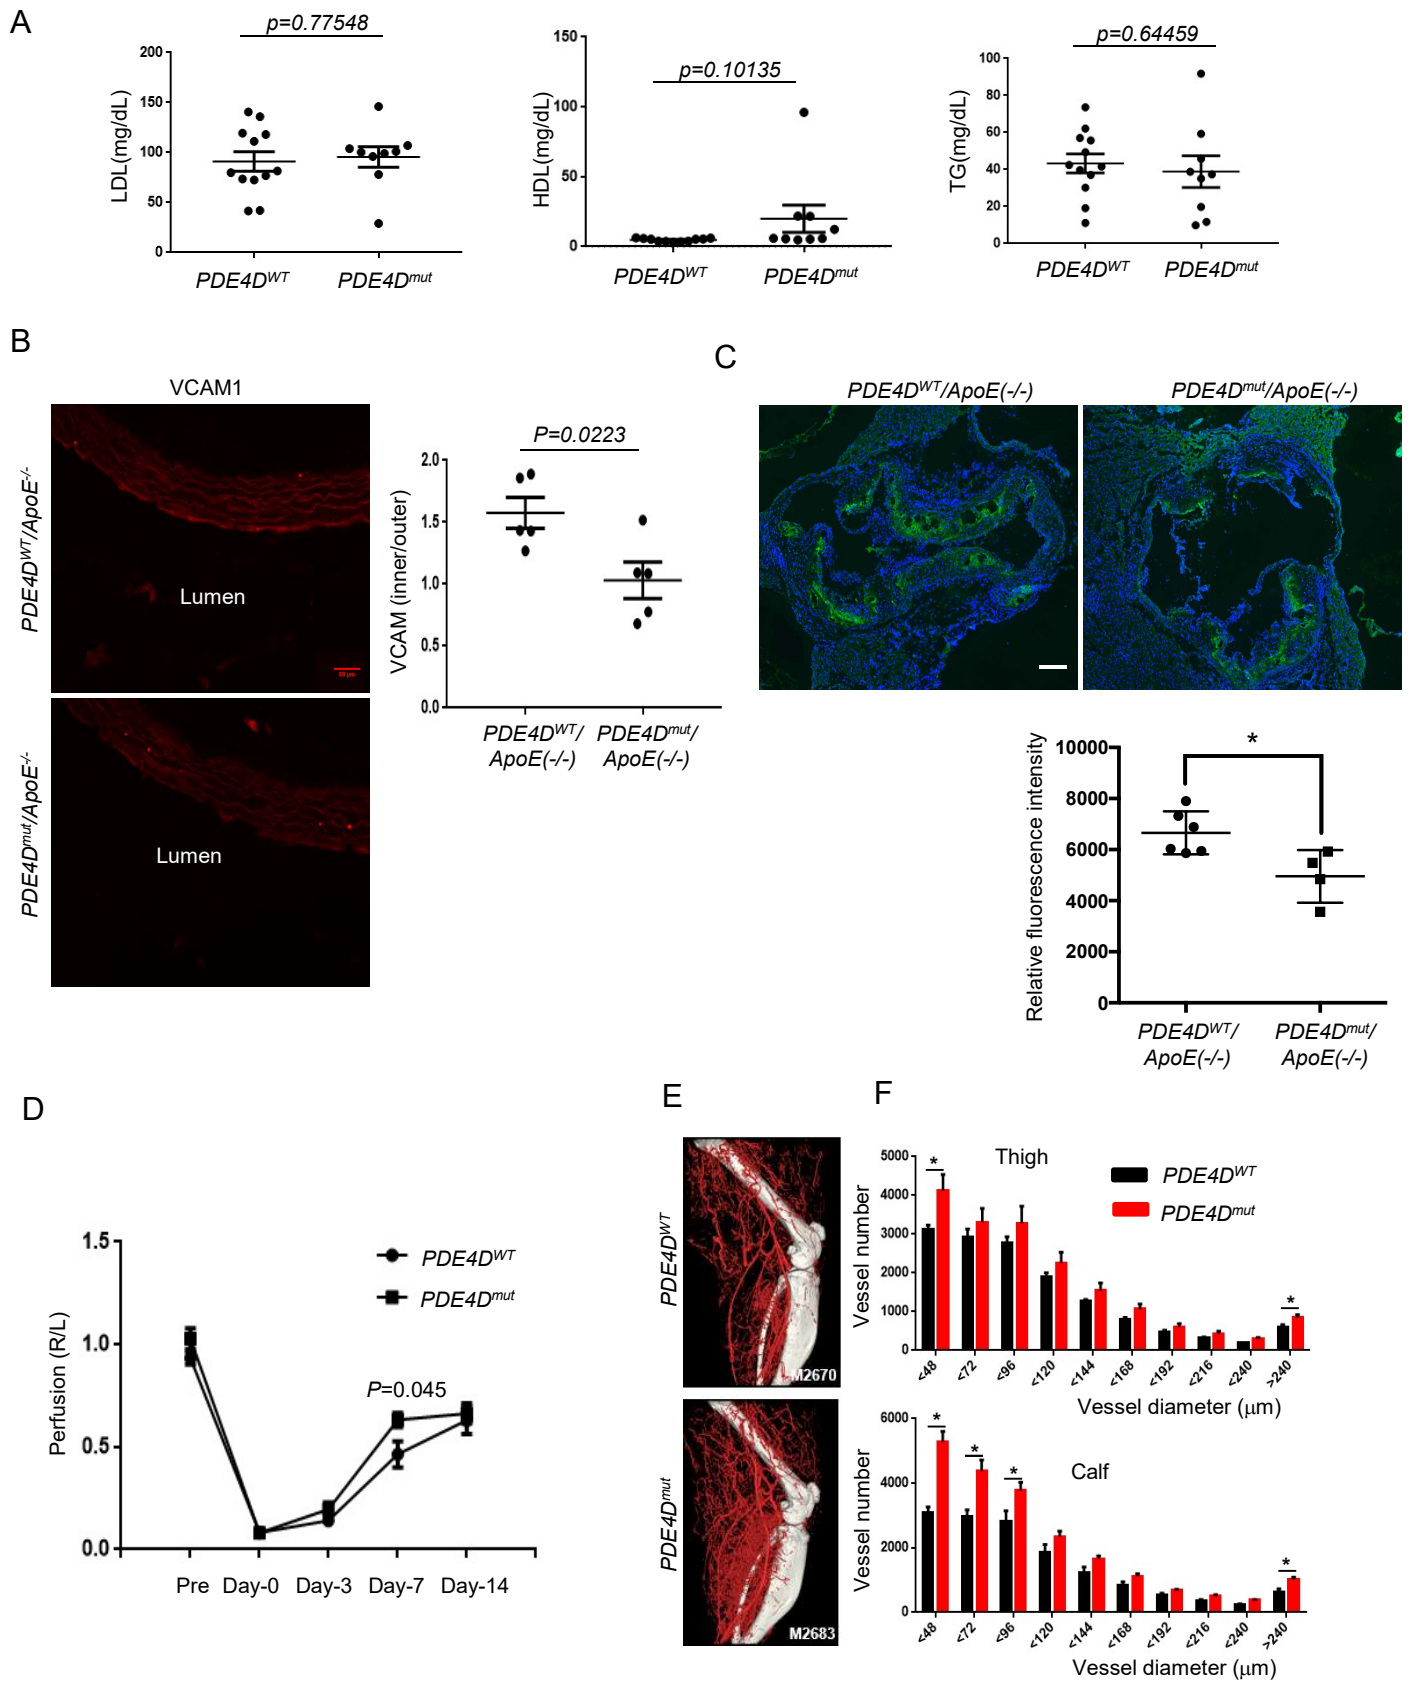

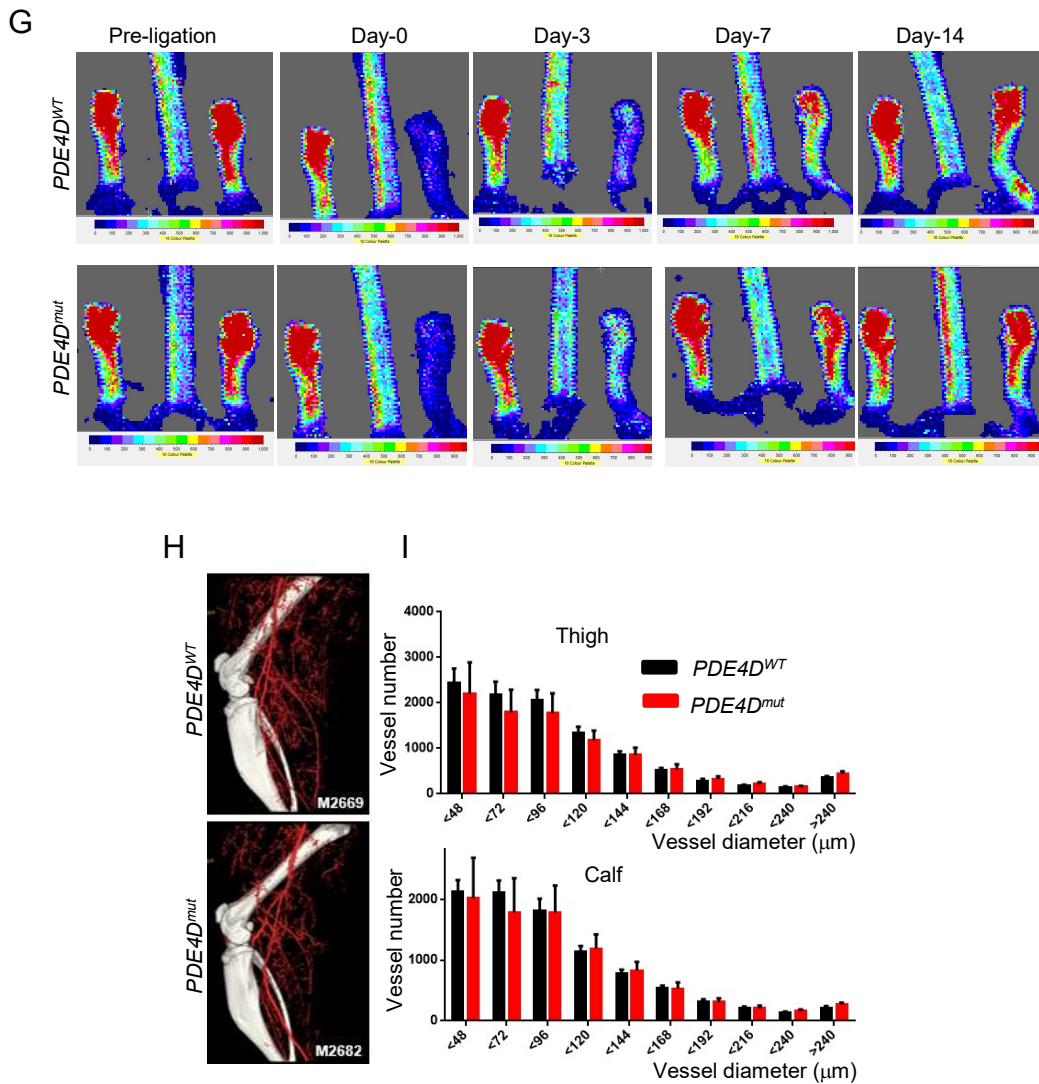

## 2. Characterization of *PDE4D*<sup>mut</sup> mice

**A.** Serum lipid profiles of *PDE4D*<sup>mut</sup>; *ApoE*<sup>-/-</sup> mice on high fat diets (n=9-12). **B.** Longitudinal sections of aortas from *WT* or *PDE4D*<sup>mut</sup> *ApoE* null mice after 4 months on a high fat diet were stained for VCAM1. Images show the inner curvature of the aortic arch. **C.** MMP activity within the plaque was measured using in situ zymography. Scale bar: 200 μm. **D.** Blood flow recovery. Femoral artery ligation was performed on the right leg of three month old wild type or mutant mice and blood flow measured by laser Doppler at each time; values are means ±SEM, n=6. \*p<0.05 by two-tailed t-test. **E, F.** MicroCT of ischemic legs 14 days after surgery. Results were quantified according to vessel diameter. \* p< 0.05 in two-tailed t-tests. **G.** Representative Doppler images of hindlimb blood flow at the indicated times after femoral artery ligation. **H, I.** Vessel density in the control leg 14 days after surgery by MicroCT. Results were quantified according to vessel diameter. \*p<0.05 by two-tailed t-test

### LCMS Peptides

**Protein ID** 2ABA\_PIG  
**Protein Name** Serine/threonine-protein phosphatase 2A 55 kDa regulatory subunit B alpha isoform (Fragment) OS=Sus scrofa GN=PPP2R2A PE=2 SV=1  
**Percent Coverage** 22.8

#### 5 peptides identified with score greater than identity score

| Score | Expectation | Peptide Sequence  | Start | End | M/Z      | Ion Mass  | Ion Mass(calc) | Delta   | ppm  | Charge |
|-------|-------------|-------------------|-------|-----|----------|-----------|----------------|---------|------|--------|
| 86.58 | 1.1E-7      | R.VVIFQQEQENK.I   | 31    | 41  | 681.3606 | 1360.7066 | 1360.6987      | 0.008   | 5.9  | 2      |
| 77.63 | 6.8E-7      | R.SFFSEIISISDVK.F | 258   | 271 | 779.9067 | 1557.7989 | 1557.7926      | 0.0062  | 4    | 2      |
| 70.9  | 0.0000039   | K.NAAQFLSTNDK.T   | 85    | 96  | 661.3403 | 1320.666  | 1320.6674      | -0.0014 | -1.1 | 2      |
| 51.35 | 0.00034     | R.DITLEASR.E      | 355   | 362 | 452.741  | 903.4674  | 903.4661       | 0.0013  | 1.4  | 2      |
| 41.53 | 0.0023      | R.INLWHLEITDR.S   | 179   | 189 | 470.5894 | 1408.7462 | 1408.7463      | -0.0001 | -0.1 | 3      |

Export options: [CSV](#) | [Excel](#)

#### One peptide identified with score between homology score and identity score

| Score | Expectation | Peptide Sequence       | Start | End | M/Z      | Ion Mass  | Ion Mass(calc) | Delta   | ppm  | Charge |
|-------|-------------|------------------------|-------|-----|----------|-----------|----------------|---------|------|--------|
| 15.85 | 0.41        | R.GEYNYSTFQSHEPEFDYK.S | 48    | 67  | 818.3667 | 2452.0782 | 2452.0859      | -0.0077 | -3.1 | 3      |

Export options: [CSV](#) | [Excel](#)

#### 2 peptides identified with score less than homology score

| Score | Expectation | Peptide Sequence | Start | End | M/Z      | Ion Mass  | Ion Mass(calc) | Delta  | ppm | Charge |
|-------|-------------|------------------|-------|-----|----------|-----------|----------------|--------|-----|--------|
| 8.63  | 6.6         | R.DKRPEGYNLK.E   | 107   | 116 | 407.2202 | 1218.6389 | 1218.6357      | 0.0032 | 2.6 | 3      |
| 6.53  | 6.2         | R.PMDLMVEASPR.R  | 138   | 148 | 623.3024 | 1244.5903 | 1244.5893      | 0.001  | 0.8 | 2      |

Export options: [CSV](#) | [Excel](#)

### 3. Liquid chromatography-mass spec identification of B55 $\alpha$

The fibronectin-specific 55 kDa band from Fig 3A was submitted for mass analysis. Multiple peptides identify it as the PP2A B55 $\alpha$  subunit.

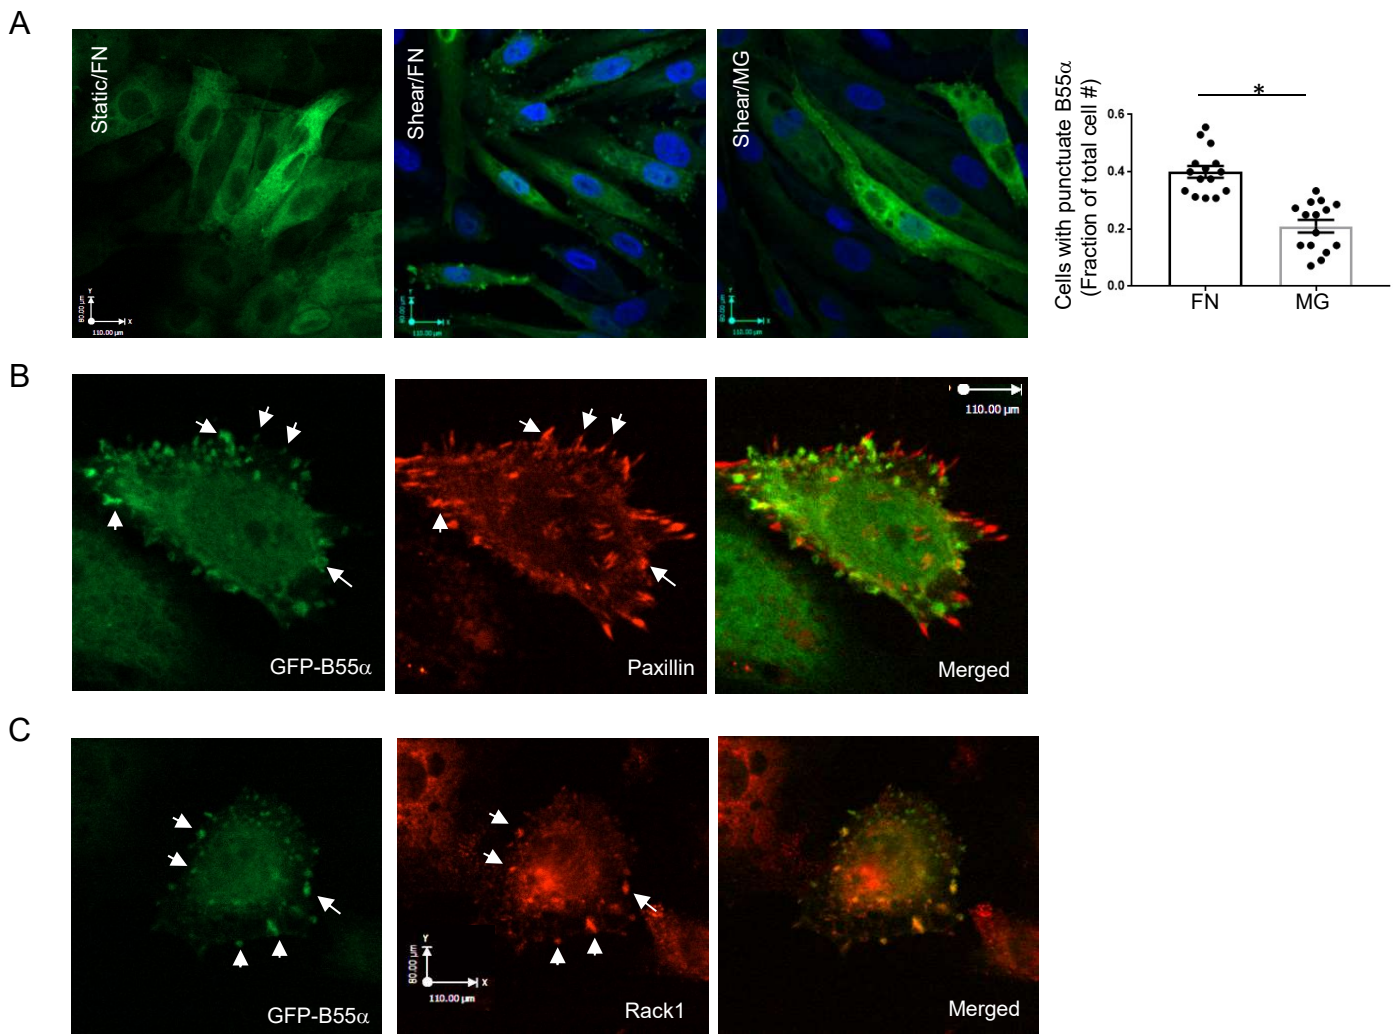

#### 4. ECM-dependent PP2A-B55 $\alpha$ localization

**A.** B55 $\alpha$  localization. BAECs expressing GFP-B55 $\alpha$  were plated on FN or MG and exposed to laminar shear for 30 min. After fixation, GFP fluorescence was imaged using confocal microscopy. The number of cells with punctuate B55 $\alpha$  was compared between FN and MG (n=15 images pooled across three independent experiments). \*p<0.05 by two-tailed t-test. **B.** BAECs expressing GFP-B55 $\alpha$  and RFP-paxillin were plated on FN and subject to shear for 30 min. **C.** BAECs expressing GFP-B55 $\alpha$  were plated on FN and exposed to shear for 30 min. After fixation, the cells were stained for RACK1 and imaged.

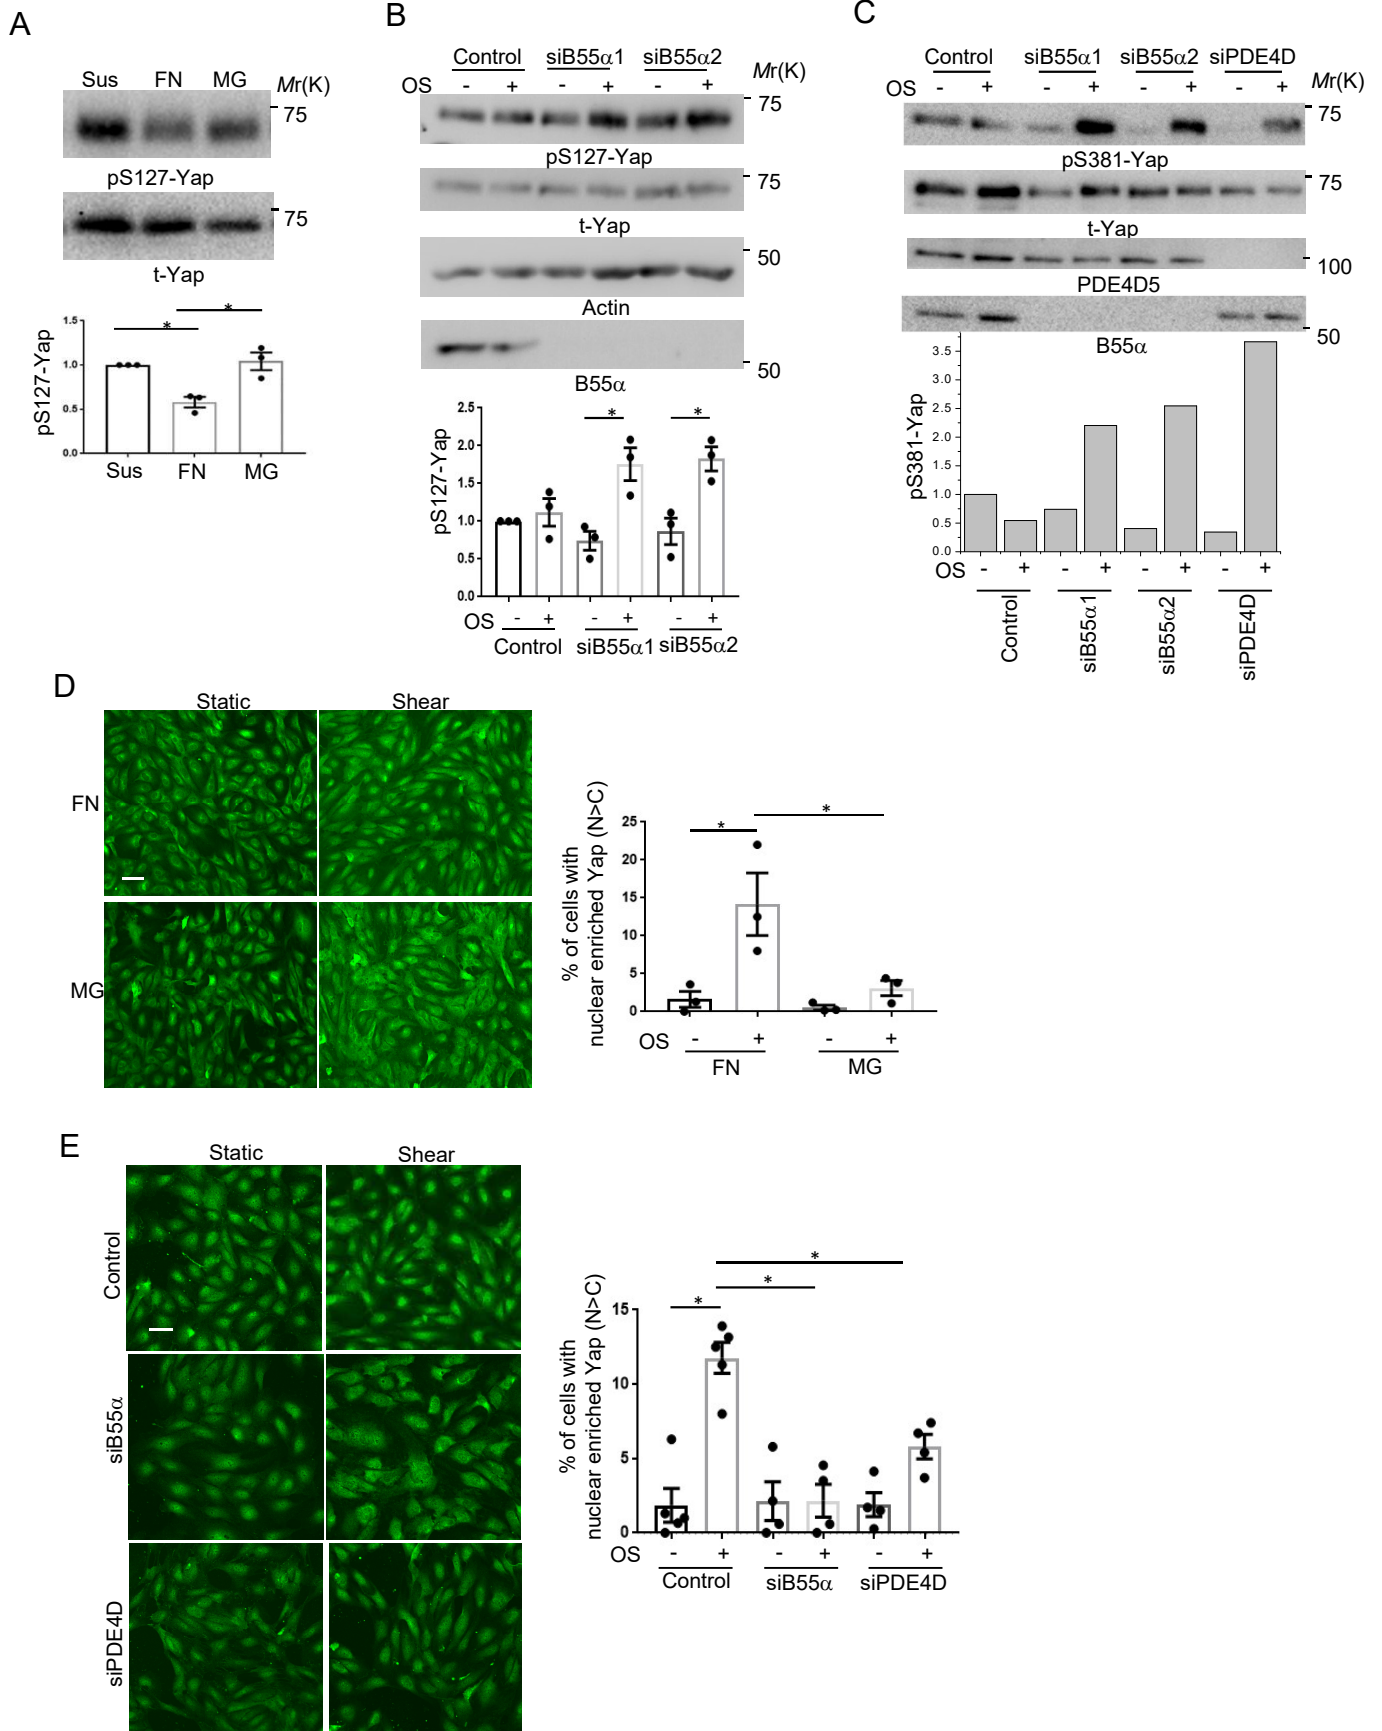

Supplemental Fig. 5

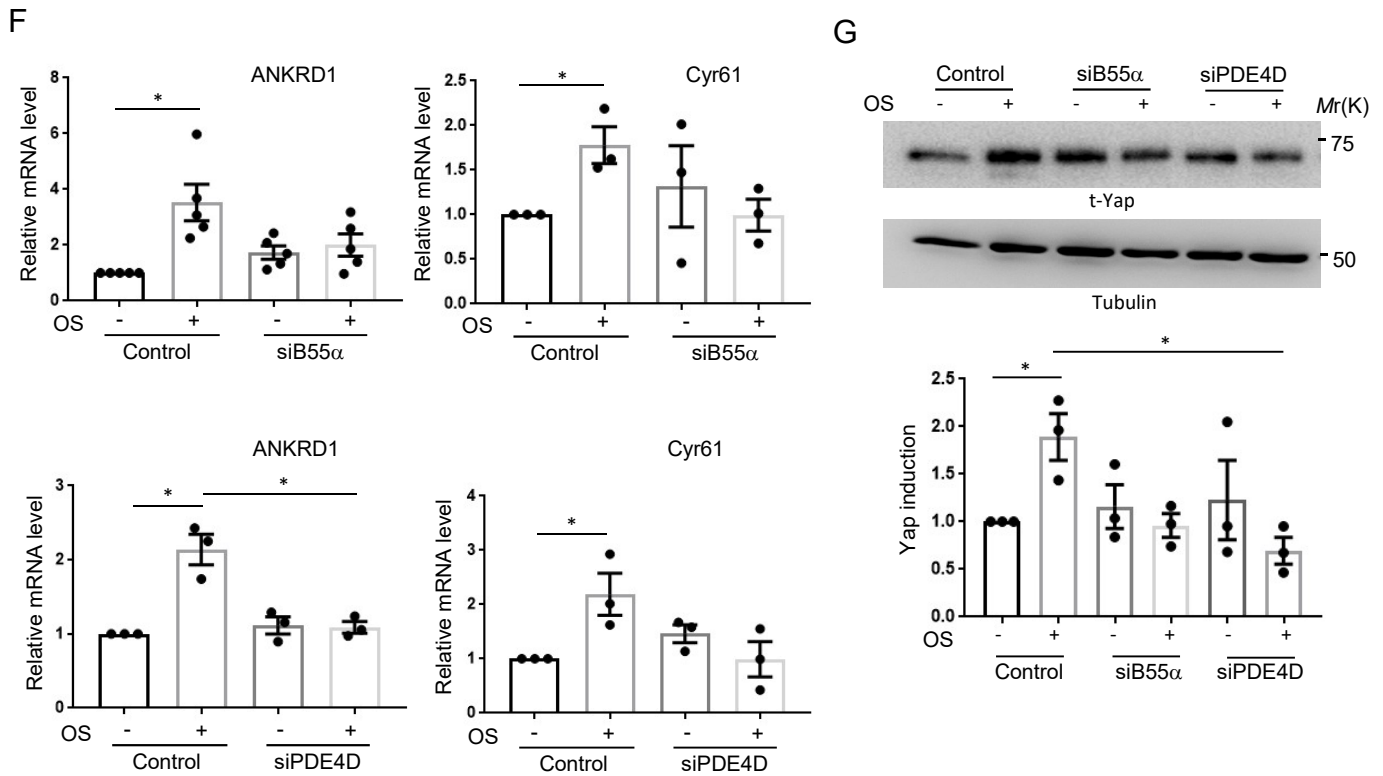

### 5. Role of PDE4D and B55 $\alpha$ on FN-induced Yap activation

**A.** BAECs were detached and kept in suspension (Sus) or replated on the indicated matrix protein for 1 hour. pS<sup>127</sup>-Yap was measured by immunoblotting (n=3). **B.** BAECs transfected with B55 $\alpha$  siRNA were detached and replated on FN, then exposed to OS for 2 hr. Yap phosphorylation was assayed as in A (n=3). **C.** HUVECs transfected with B55 $\alpha$  siRNA or PDE4D siRNA were detached and replated on FN, then sheared for 2 hr. Lysates were analyzed by Western blotting for pS<sup>381</sup>-Yap. n=3 independent experiments. **D.** HUVECs were replated on FN or MG for 6 hr and exposed to oscillatory shear for 2 hr, fixed and stained for Yap. Cells with nuclear enriched Yap (N>C) were counted from 10 random fields for each condition (n=3 independent experiments). Scale bar: 50  $\mu$ m. **E.** HUVECs were transfected with B55 $\alpha$  siRNA or PDE4D siRNA and replated on FN, were exposed to oscillatory shear for 2 hr and Yap localization assayed as (D) (n=4-5 independent experiments). Scale bar: 50  $\mu$ m. **F.** BAECs transfected with B55 $\alpha$  siRNA or PDE4D siRNA were subject to oscillatory shear for 18 hr. mRNA was isolated and transcript level of Cyr61 and ANKRD1 was measured using qPCR (n=3). **G.** HUVECs transfected with B55 $\alpha$  siRNA or PDE4D siRNA were replated on FN and subjected to oscillatory shear for 18 hr. The cells were lysed and probed for Yap expression (n=3). \*p<0.05 by two-tailed t-test (B, C, F) or one way ANOVA (A, D, E, G).

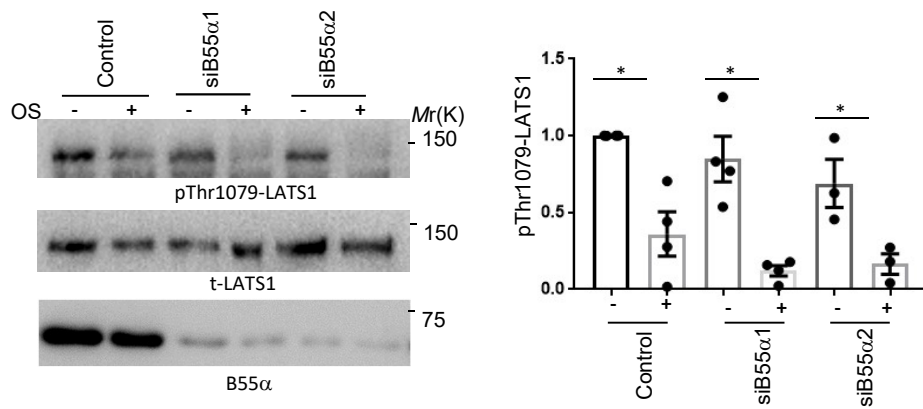

### 6. B55α regulation of the Hippo pathway

BAECs transfected with B55α siRNAs were plated on FN and subjected to oscillatory shear for 2 hr. Flow-dependent LATS1 phosphorylation was measured using pT<sup>1079</sup>-LATS1 antibody (n=4). \*p<0.05 by two-tailed t-test.



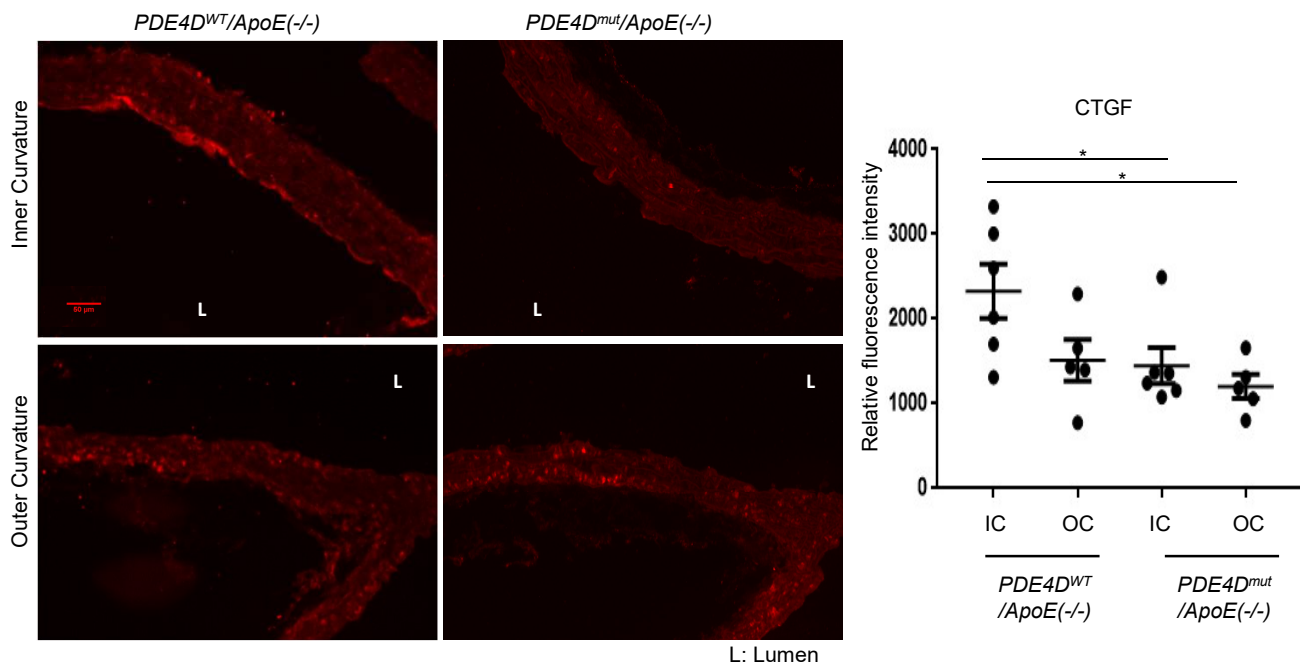

### 7. Effect of PDE4D mutation on Yap target gene expression

Aortas from *PDE4D*<sup>WT</sup>/*ApoE* <sup>null</sup> mice or *PDE4D*<sup>mut</sup>/*ApoE* on normal chow were fixed, longitudinally sectioned and stained for Yap target gene, CTGF. Mean intensity in the endothelial layer of the inner curvature (IC) and outer curvature (OC) was quantified (arbitrary units). \**p*<0.05 by one way ANOVA with Dunnett's multiple comparisons test.
